# Supplementary material
Source: PubMed Central journal article supplement (PMC3442881)
Supplement: auto-8-1342-s01.pdf [file auto-8-1342-s01.pdf]

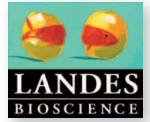

## Supplemental Material to:

Audrey Chong, Tara D. Wehrly, Robert Child, Bryan Hansen,  
Seungmin Hwang, Herbert W. Virgin and Jean Celli

Cytosolic clearance of replication-deficient mutants  
reveals *Francisella tularensis* interactions with the  
autophagic pathway

Autophagy 2012; 8(9)

<http://dx.doi.org/10.4161/auto.20808>

[www.landesbioscience.com/journals/autophagy/article/20808](http://www.landesbioscience.com/journals/autophagy/article/20808)

## 2012AUTO0102 – Supplementary Information

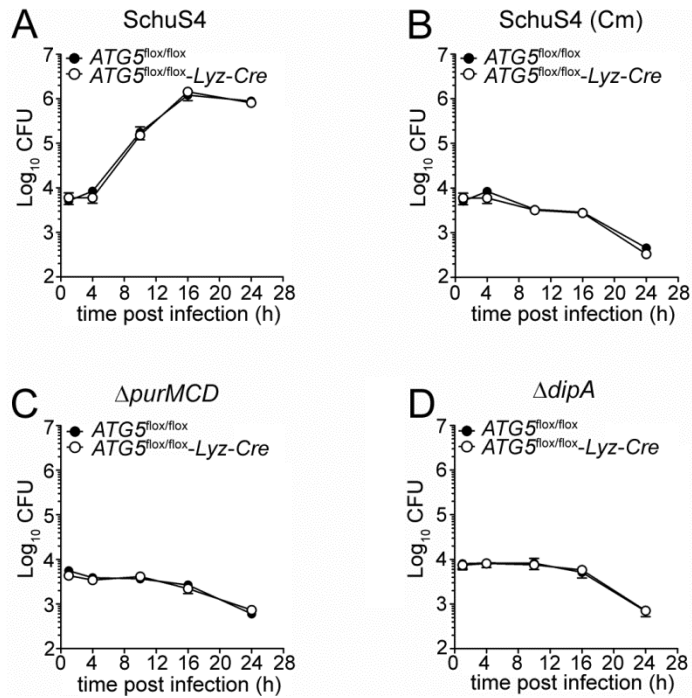

Figure S1. Intracellular growth of SchuS4 (A), SchuS4 (B) treated with chloramphenicol at 6 h pi, and its isogenic  $\Delta purMCD$  (C) and  $\Delta dipA$  (D) mutants in *ATG5<sup>flox/flox</sup>* and *ATG5<sup>flox/flox</sup>-Lyz-Cre* BMMs. Intracellular bacteria were enumerated from CFUs at various times p.i. Data are means  $\pm$  SD from a representative experiment performed in triplicate out of two independent repeats.

## 2012AUTO0102 – Supplementary Information

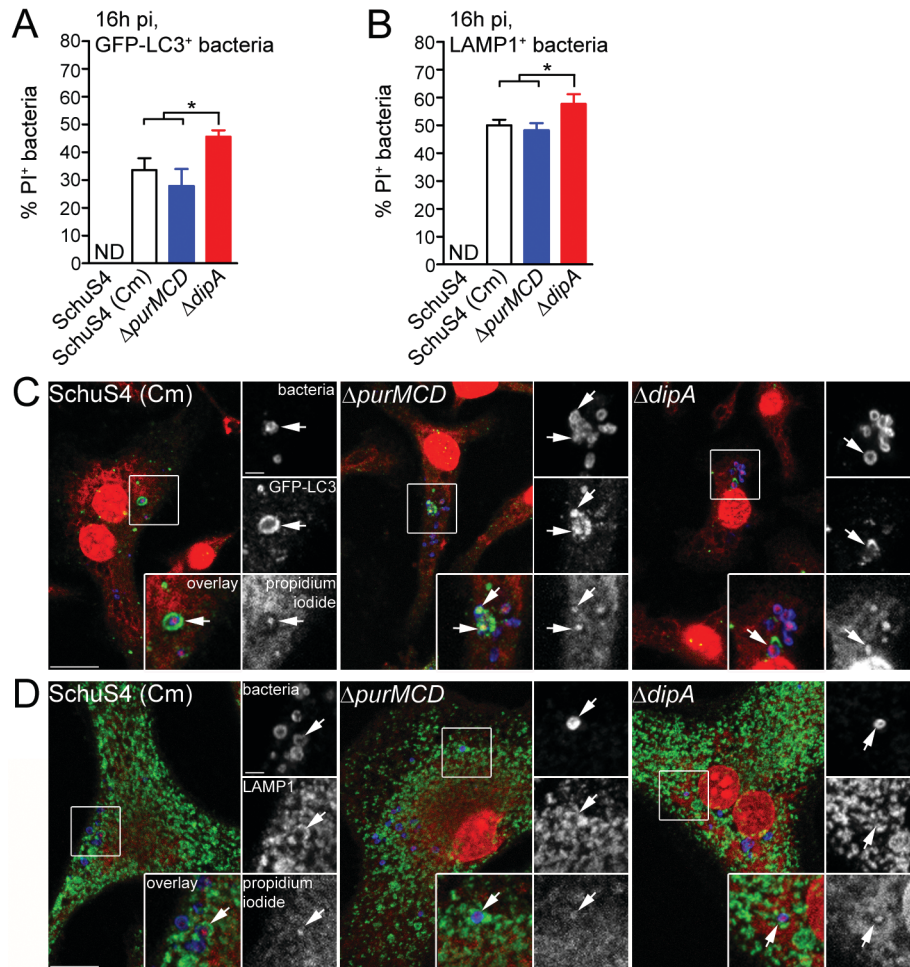

Figure S2. Viability of replication-deficient *Francisella* contained within autophagic vacuoles. (A and B) Quantification of LC3-positive (A) or LAMP1-positive (B) bacteria for propidium iodide labeling at 16 h p.i. Infected BMMs were subjected to an intracellular viability assay followed by immunofluorescence labelling for GFP (A) or LAMP1 (B). GFP-LC3- or LAMP1-positive bacteria were scored for propidium iodide labeling. At least 30 bacteria per experiment were scored for each condition. Data are means  $\pm$  SD from three independent experiments. ND, not determined. Asterisks indicate statistically significant differences (\* $p < 0.05$ , two-tailed unpaired Student's t-test). (C and D) Representative confocal images of BMMs infected with either SchuS4 or its derivatives and processed for an intracellular viability assay (red) followed by immunofluorescence labeling of bacteria (blue), GFP (C, green) or LAMP1 (D, green) at 16 h p.i. Magnified insets show single channel images of the boxed areas. White arrows indicate propidium iodide-labelled bacteria enclosed within GFP-LC3- or LAMP1-positive vacuoles. Scale bars, 10 or 2  $\mu$ m.
